# Supplementary material
Source: PubMed Central journal article supplement (PMC4245250)
Supplement: 10-1055-s-0034-1383297-sup_gf853.pdf [file 10-1055-s-0034-1383297-sup_gf853.pdf]

# Progesteron in der Peri- und Postmenopause – ein Überblick

## Progesterone in Peri- and Postmenopause: A Review

### Autor

P.-A. Regidor<sup>1,2</sup>

### Institute

<sup>1</sup> Praxis für Frauenheilkunde, München  
<sup>2</sup> Velvian GmbH, Ismaning

### Schlüsselwörter

- Hormontherapie
- Progesteron
- Menopause
- Wechseljahresbeschwerden

### Key words

- hormone therapy
- progesterone
- menopause
- menopausal symptoms

### Zusammenfassung

▼  
Aktuell leben 14,5 Millionen peri- und postmenopausale Frauen in Deutschland. Gleichzeitig gibt es ungefähr 450 000 neue menopausale Frauen pro Jahr, die eine Lebenserwartung von bis zu 85 Jahren haben. Die Herausforderung besteht daher in einer möglichst nebenwirkungsarmen Therapie bei den Frauen mit menopausalen Beschwerden, um einer Verschlechterung ihrer Lebensqualität entgegenzuwirken. Ziel einer Hormontherapie (HT) sollte die Behebung des Hormonmangels sein, wobei Substanzen mit dem besten Nutzen-Risiko-Profil eingesetzt werden sollten. Hier spielt Progesteron eine neue und wichtige Rolle. Beim Progesteron handelt es sich um den wichtigsten Vertreter der Gestagene. Durch Mikronisierungsverfahren können biologisch wirksame Formulierungen hergestellt werden, sodass es seit 1996 Anwendung im klinischen Alltag findet. Dennoch wurde bis 2003 den synthetischen Gestagenen und nicht dem Progesteron der Vorzug gegeben. Die Erhöhungen des Mammakarzinomrisikos in der WHI-Studie auf eine Ratio von 1,23 und in der Million-Women-Studie auf bis zu 2 sind daher auch unter diesem Aspekt zu werten. Beim Vergleich zwischen synthetischen Gestagenen und Progesteron konnte in der E3N-Studie gezeigt werden, dass es unter einer transdermalen Östrogengabe zusammen mit Progesteron nicht zu einer Erhöhung der Mammakarzinomrate (RR von 1,08) kommt. Progesteron verändert nicht die HDL/LDL-Cholesterinratio. Es hat keinen Einfluss auf den Kohlenhydratstoffwechsel, die Hämostase, den Blutdruck, die Thrombogenität und das Körpergewicht, da es auch antimineralokortikoid wirkt. Die Gabe von 200 mg Progesteron pro Tag über 12 Tage im Zyklus oder die tägliche Gabe von 100 mg in Kombination mit einem Östrogen stellen daher eine sichere Option in der Behandlung der meno-

### Abstract

▼  
Around 14.5 million peri- and postmenopausal women currently live in Germany. Moreover, approximately 450 000 women, each with a life expectancy of around 85 years, reach menopause every year in Germany. The challenge is therefore to find a therapy with few side effects which could improve the quality of life of women with menopausal symptoms. The aim of hormone therapy (HT) is to remedy hormone deficiencies using substances that offer the best trade-off between benefits and risks. This is where progesterone has a new and important role to play. Progesterone is one of the most important gestagens. Biologically effective progesterone formulations created with micronization techniques have been used in clinical practice since 1996. Nevertheless, up until 2003 preference was given to synthetic gestagens rather than progesterone. The increased breast cancer hazard ratio of 1.23 reported in the WHI study and of 2 given in the Million Women Study has been associated with the use of synthetic gestagens. In a comparison between synthetic gestagens and progesterone, the E3N Study showed that the transdermal administration of estrogen and progesterone did not lead to an increase in breast cancer rates (RR: 1.08). The administration of progesterone does not change the HDL/LDL cholesterol ratio. Because of its anti-mineralocorticoid effect, progesterone has no impact on carbohydrate metabolism, hemostasis, blood pressure, thrombogenicity and body weight. The administration of 200 mg/day progesterone over 12 days of a menstrual cycle or a daily administration of 100 mg combined with an estrogen are a safe and well-tolerated option to treat menopausal symptoms, with a better benefit risk profile compared to synthetic gestagens.

eingereicht 27. 1. 2014

revidiert 1. 10. 2014

akzeptiert 1. 10. 2014

### Bibliografie

DOI <http://dx.doi.org/10.1055/s-0034-1383297>  
Geburtsh Frauenheilk 2014; 74:  
1–8 © Georg Thieme Verlag KG  
Stuttgart · New York ·  
ISSN 0016-5751

### Korrespondenzadresse

**Pedro-Antonio Regidor,  
MD PhD**  
Praxis für Frauenheilkunde  
Bauberger Straße 16  
80992 München  
regidor@t-online.de

pausalen Beschwerden dar, bei gleichzeitig besserem Nutzen-Risiko-Profil als die synthetischen Gestagene.

## Einleitung

Anfang des 20. Jahrhunderts begann die Erforschung der physiologischen Wirkungen des Gelbkörperhormons [1]. Bei trächtigen Tieren wurde ein Abort erzielt, wenn die Gelbkörper der Ovarien zerstört wurden. Dies konnte durch die Injektion von Gelbkörperextrakt verhindert werden. Aus den Gelbkörperextrakten wurde schließlich im Jahr 1934 Progesteron von mehreren Forschergruppen unabhängig voneinander synthetisiert. In den USA wurde die Substanz Progestin und in Europa Luteosteron genannt. Erst im Jahr 1935 einigten sich die Länder auf den Namen Progesteron als Zeichen, dass dieses Hormon während einer Schwangerschaft (pro gestationem [lat.]: für die Schwangerschaft) eine wichtige Rolle spielt [2, 3]. Mitte der 1940er-Jahre gelang es Russell Marker, reines Progesteron in großen Mengen aus dem Pflanzenstoff Diosgenin zu synthetisieren. Es waren jedoch sehr hohe orale Dosen notwendig, um biologische Effekte zu erzielen. Fortschritte in der Galenik, v.a. die Mikronisierung der Substanzpartikel, führten dazu, dass die Resorption von Progesteron verbessert wurde, und ermöglichten ab dem Jahr 1980 eine orale Therapie mit natürlichem Progesteron [4, 5].

Progesteron ist ein Steroid, das 21 Kohlenstoffe enthält. Es wird im menschlichen Körper in den Synzytiotrophoblasten und in den luteinisierten Granulosazellen der Ovarialfollikel sowie in der Fascia corticalis und in den Retinabereichen der Nebennierenrinde gebildet.

Vorstufen für Progesteron sind LDL-, VLDL-, HDL- sowie de-novo-synthetisiertes Cholesterin (VDL: Lipoprotein von sehr geringer Dichte). Progesteron ist zu 95–98% im Blut an Proteine gebunden, insbesondere an Albumin. Die orale Anwendung erhöht die Plasmaspiegel von Progesteronmetaboliten, hauptsächlich von Pregnanolol, Pregnanolon (Dihydroprogesteron), Pregnandion, 20- $\alpha$ -Dihydroprogesteron und 17-OH-Progesteron [6–8]. Letztendlich entsteht durch die 5- $\alpha$ -Hydroxysteroid-Dehydrogenase rasch Allopregnanolon, das ein wichtiges neuroaktives Steroid darstellt [9, 10].

Progesteron hat sowohl systemische als auch lokale Effekte. Auf der systemischen Ebene erhöht Progesteron durch die Aktivierung des Renin-Angiotensin-Systems die Diurese, der katabole Stoffwechsel wird angetriggert, es relaxiert glatte Muskelzellen, erhöht die Ausscheidung von Kalzium bzw. Phosphor sowie die Körpertemperatur, hat sedierende und analgetische Wirkungen, fördert das visuelle Gedächtnis sowie die Proliferation bzw. Differenzierung von Osteoblasten und weist außerdem eine immun-supprimierende Wirkung auf [11]. Unabhängig hiervon war lange Zeit die gängige Meinung, dass die orale Verabreichung von Progesteron nur einen geringen Effekt hat, da durch den First-Pass-Effekt der Leber die Bioverfügbarkeit deutlich herabgesetzt wird [12]. Dies führte zur Etablierung synthetischer Gestagene als Abkömmlinge vom Testosteron oder 17-Hydroxyprogesteron, die auch resistenter gegenüber hepatischem Abbau sind. Synthetische Gestagene haben jedoch nicht unerhebliche Nebenwirkungen durch ihre Anti- oder Proöstrogeneffekte, Anti- oder Proandrogeneffekte und ihre Mineralokortikoideffekte oder über ihre negativen Veränderungen des Glukosestoffwechsels oder Lipidmetabolismus [13]. Die weitere Entwicklung auf dem Sektor der Mikronisierung und die Einbettung des Progesterons in Öllösungen führten schließlich zu neuen Daten, die belegen, dass

eine wirksame Bioverfügbarkeit von oral verabreichtem Progesteron vorhanden ist [13]. Simon et al. konnten zusätzlich aufzeigen, dass die effektivsten Serumwerte bei der Aufnahme mit den Mahlzeiten vorlagen [14].

Progesteron bewirkt eine Reihe von Veränderungen im Bereich des Reproduktionstrakts und der Brustdrüse, die auch für den möglichen therapeutischen Einsatz wichtig sind:

1. Umstellung des Endometriums von der Proliferations- auf die Sekretionsphase [15]
2. Vorbereitung auf eine mögliche Implantation [16, 17]
3. Aufrechterhaltung der Schwangerschaft [18]
4. Verminderung der Muskelaktivität des Uterus durch Erhöhung  $\beta$ -adrenerger Rezeptoren und Reduzierung der Sensitivität auf Oxytocin [19–21]
5. Verringerung der Prostaglandinsynthese [22]
6. Progesteron fördert das Wachstum der Lobuli und Ductuli des Drüsenkörpers der Brust [23, 24].
7. Die in der Schwangerschaft sehr hohen Progesteronspiegel tragen zur Vorbereitung der Brustdrüse auf die Milchbildung bei [25].

Daher kristallisieren sich für Progesteron eine Reihe von Anwendungsbereichen heraus, die durch die vielseitigen Effekte dieses Hormons bedingt sind.

## Indikationen für die Anwendung von Progesteron

Bei den vorhandenen Standards, sowohl in der Gynäkologie als auch in der Geburtshilfe, gibt es eine Reihe von anerkannten Indikationen für die Anwendung von Progesteron:

- ▶ primäre oder sekundäre Amenorrhö [26]
- ▶ Infertilität bei bekannter Corpus-luteum-Insuffizienz [27]
- ▶ Behandlung der Endometriose [28, 29]
- ▶ Behandlung der fibrozystischen Mastopathie [30]
- ▶ Behandlung des prämenstruellen Syndroms [31]
- ▶ Unterstützung der Lutealphase im Rahmen von IVF-Therapien (IVF: In-vitro-Fertilisation) [32]
- ▶ Therapie von Frühgeburtsbestrebungen [33]
- ▶ Endometriumschutz während einer HT mit Östrogen [34–44]

Der Nachweis, dass mikronisiertes Progesteron besser vertragen wird als synthetische Gestagene, ist in letzter Zeit häufig angeführt worden [35–37].

Progesteron spielt von Natur aus eine sehr wichtige Rolle am Endometrium: in erster Linie für die Implantation und Entwicklung einer befruchteten Eizelle. Wesentliche Beteiligungen sind die sekretorische Umwandlung des Endometriums, die Dezidualisierung des Endometriums, die Triggerung der Synthese von PAPP (schwangerschaftsassoziertes Protein), PP14 (Plazentaprotein 14) und Uteroglobulin, die Bildung von PIBF (progesteroninduzierter Blockierfaktor), den Wechsel von Th1- zu Th2-Zellen (Th-Zelle: T-Helferzelle), die Stimulation der Prostaglandin-E<sub>2</sub>-Produktion und die Unterdrückung der Matrix-Metalloproteinasen MMP3 und MMP9 [38]. All diese Faktoren führen zu einer geordneten Entwicklung einer Gravidität.

An der Brust bewirkt Progesteron, dass der Östrogenrezeptor herunterreguliert sowie die östrogenstimulierte Proliferation gesunder Epithelzellen gehemmt wird [39]. Progesteron kann menschliche Brustkrebszellen in der G<sub>1</sub>-Phase (G: Gap) nach an-

fänglicher Stimulation im 2. Zellzyklus arretieren [40]. Direkt am Brustgewebe konnte festgestellt werden, dass der normale Progesteronanstieg in der Lutealphase dazu führt, dass der Östrogen-, nicht jedoch der Progesteronrezeptor herunterreguliert wird. Dies ist eine wichtige antiöstrogene und -proliferative Wirkung am Brustepithel [41]. Auch weitere Untersuchungen bestätigten, dass die Zellproliferation direkt vom Östrogen-Progesteron-Verhältnis im Brustgewebe abhängig ist und während der Lutealphase niedriger ist als während der Follikelphase [42]. Hieraus resultiert eine schützende Wirkung des Progesterons auf das Brustgewebe im Allgemeinen. Ein weiterer Faktor, der dies untermauert, ist die apoptosefördernde Wirkung sowie die Hemmung der reduktiven 17 $\beta$ -HSD (Hydroxysteroid-Dehydrogenase) im Brustgewebe, die besonders aktiv in Mammakarzinomen anzutreffen ist [43,44].

### Progesteron in Peri- und Postmenopause

Im Folgenden werden die Aspekte des Progesterons beim Einsatz in der Peri- und Postmenopause im Überblick dargestellt.

#### Wirkung am Endometrium

Obwohl die orale Bioverfügbarkeit von Progesteron nicht hoch ist, belegt die PEPI-Studie eindrucksvoll, dass ein sicherer Schutz am Endometrium, trotz der Gabe von Östrogenen zur Behandlung menopausaler Symptome, vorliegt. In dieser placebokontrollierten Untersuchung wurde die Wirksamkeit von mikronisiertem Progesteron bei der Prävention der Endometriumhyperplasie mit Placebo und 2 verschiedenen MPA-Behandlungsschemata (MPA: Medroxyprogesteronacetat) verglichen. Mikronisiertes Progesteron, 1-mal täglich über 12 Tage vor der Nachtruhe appliziert, war in Bezug auf den Schutz des Endometriums vor hyperplastischen Veränderungen im Zusammenhang mit der Östrogentherapie ebenso wirksam wie die beiden MPA-Therapien [34] (● Tab. 1). Diese Daten des Endometriumschutzes konnten davor schon von Lalumiere [45] erhoben werden. Gleichzeitig konnte dargelegt werden, dass die mit mikronisiertem Progesteron behandelten Frauen signifikant weniger und kürzere Blutungen aufwiesen als die Kontrollgruppe, die mit MPA behandelt worden war. Auch hier erhielten die Patientinnen 200 mg Progesteron über einen Zeitraum von 12 Tagen. Pelissier [46] stellte im Jahr 2001 bei 336 früh postmenopausalen Frauen ebenfalls fest, dass ein effektiver Endometriumschutz unter mikronisiertem Progesteron vorliegt. In dieser Untersuchung erhielt 1 Gruppe zusätzlich zum transdermalen Östrogen Chlormadinonacetat 10 mg/d und die andere Gruppe 200 mg Progesteron über 14 Tage. Etwa ein Drittel der Frauen mit mikronisiertem Progesteron war nach 6 bzw. 18 Monaten amenorrhöisch.

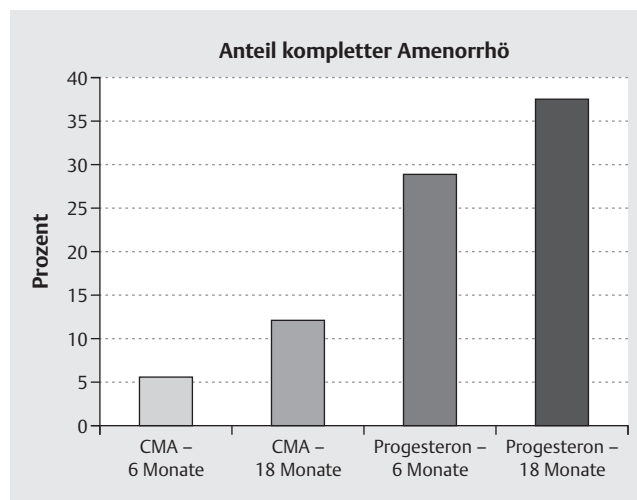

Abb. 1 Amenorrhö nach 6- bzw. 18-monatiger Behandlung mit 10 mg Chlormadinonacetat bzw. 200 mg Progesteron; Anwendung über 14 Tage [46]. CMA: Chlormadinonacetat

Auch das allgemeine Blutungsverhalten war unter Progesteron stabiler als unter der Therapie mit Chlormadinonacetat (● Abb. 1).

Da die Transformationsdosis für Progesteron 2000 mg pro Zyklus beträgt, sollen entweder 100 mg/d kontinuierlich oder 200 mg/d sequenziell über einen Zeitraum von 12–14 Tagen angewandt werden, um eine sichere sekretorische Umwandlung eines zuvor mit Östrogenen behandelten Endometriums zu erreichen [47].

#### Die Wirkung auf die Brust

Seit der Veröffentlichung der WHI-Studie [48] wird eine HT in der Menopause mit einer Erhöhung der Mammakarzinomrate assoziiert. Sowohl diese Daten als auch die Ergebnisse der Million-Women-Study [49] führten Anfang des Jahres 2000 zu einer abrupten Abnahme in der hormonellen Behandlung der menopausalen Beschwerden.

Dies ist ebenfalls in tierexperimentellen Untersuchungen festgestellt worden [50]: Langfristige Behandlungen mit Östradiol und Progesteron führten zu promovierenden Effekten auf die Brustkrebshäufigkeit nach der Gabe chemischer kanzerogener Stoffe oder auch spontan.

Untersuchungen an Brustkrebszelllinien zeigten jedoch, dass Progesteron in hohen Konzentrationen einen antiproliferativen Effekt (proapoptotisch) aufweist; mit geringen MPA-Konzentrationen jedoch ein umgekehrter Effekt vorhanden war. Synthetische Gestagene wie MPA oder Norethisteron alleine oder ge-

Tab. 1 Ergebnisse der Endometriumbiopsien am Studienende [34].

| Ergebnisse                         | Placebo | CEE alleine | CEE + zyklisch MPA | CEE + cont. MPA | CEE + mikronisiertes Progesteron |
|------------------------------------|---------|-------------|--------------------|-----------------|----------------------------------|
| normal                             | 116     | 45          | 112                | 119             | 114                              |
| einfache (zystische) Hyperplasie   | 1       | 33          | 4                  | 1               | 5                                |
| komplexe (adenomatöse) Hyperplasie | 1       | 27          | 2                  | 0               | 0                                |
| Atypie                             | 0       | 14          | 0                  | 0               | 1                                |
| Adenokarzinom                      | 1       | 0           | 0                  | 0               | 0                                |

CEE: konjugierte equine Östrogene (conjugated equine estrogens); MPA: Medroxyprogesteronacetat; cont.: durchgehend (continuous)

**Tab. 2** Progesteron und synthetische Gestagene und ihre Eigenschaften (mod. nach [73]).

|                                         | Proges-<br>togen | anti-<br>gonado-<br>trop | Anti-<br>östro-<br>gen | Östro-<br>gen | Andro-<br>gen | Anti-<br>andro-<br>gen | Gluko-<br>kortikoid | Antimineralo-<br>kortikoid |
|-----------------------------------------|------------------|--------------------------|------------------------|---------------|---------------|------------------------|---------------------|----------------------------|
| Progesteron                             | +                | +                        | +                      | -             | -             | ±                      | +                   | +                          |
| Dydrogesteron                           | +                | -                        | +                      | -             | -             | ±                      | -                   | ±                          |
| Medrogeston                             | +                | +                        | +                      | -             | -             | ±                      | -                   | -                          |
| <b>17a-Hydroxy-Progesteron-Derivate</b> |                  |                          |                        |               |               |                        |                     |                            |
| Chlormadinonacetat                      | +                | +                        | +                      | -             | -             | +                      | +                   | -                          |
| Cyproteronacetat                        | +                | +                        | +                      | -             | -             | ++                     | +                   | -                          |
| Megestrolacetat                         | +                | +                        | +                      | -             | ±             | +                      | +                   | -                          |
| Medroxyprogesteronacetat                | +                | +                        | +                      | -             | ±             | -                      | +                   | -                          |
| <b>19-Nor-Progesteron-Derivate</b>      |                  |                          |                        |               |               |                        |                     |                            |
| Nomegestrolacetat                       | +                | +                        | +                      | -             | -             | ±                      | -                   | -                          |
| Promegeston                             | +                | +                        | +                      | -             | -             | -                      | -                   | -                          |
| Trimegeston                             | +                | +                        | +                      | -             | -             | ±                      | -                   | ±                          |
| <b>19-Nortestosteron-Derivate</b>       |                  |                          |                        |               |               |                        |                     |                            |
| Norethisteron                           | +                | +                        | +                      | +             | +             | -                      | -                   | -                          |
| Lynestrenol                             | +                | +                        | +                      | +             | +             | -                      | -                   | -                          |
| Norethinodrel                           | ±                | +                        | +                      | +             | +             | -                      | -                   | -                          |
| Levonorgestrel                          | +                | +                        | +                      | -             | +             | -                      | -                   | -                          |
| Norgestimat                             | +                | +                        | +                      | -             | +             | -                      | -                   | -                          |
| Desogestrel                             | +                | +                        | +                      | -             | +             | -                      | -                   | -                          |
| Gestoden                                | +                | +                        | +                      | -             | +             | -                      | +                   | +                          |
| Dienogest                               | +                | +                        | ±                      | ±             | -             | +                      | -                   | -                          |
| <b>Spirolonacton-Derivate</b>           |                  |                          |                        |               |               |                        |                     |                            |
| Drospirenon                             | +                | +                        | +                      | -             | -             | +                      | -                   | +                          |

meinsam mit Östrogenen können Brustkrebszellen in vitro stimulieren. Progesteron alleine oder in Kombination mit Östrogenen hatte jedoch einen antiproliferativen oder neutralen Effekt [51–53]. Otto et al. [54] präsentierten im Versuch bei Mäusen, dass MPA im gleichen Dosisbereich proliferative Effekte am Brustgewebe und hemmende Effekte am Uterus entfaltet, während bei Progesteron eine Dissoziation beobachtet wurde. Zur Induktion proliferativer Effekte am Brustgewebe waren etwa 2-fach höhere Dosierungen nötig im Vergleich zu den Dosierungen, die eine vollständige Hemmung der durch Östradiol stimulierten Endometriumproliferation herbeiführten. Progesteron weist daher einen vorteilhaften Sicherheitsabstand zwischen erwünschter Hemmung der Endometriumproliferation und der unerwünschten Brustepithelproliferation auf. Dieser Abstand war für MPA nicht nachzuweisen. Murkes et al. [55] stellten fest, dass bei der Behandlung postmenopausaler Frauen mit 1,5 mg/d Östradiol als Gel und 200 mg Progesteron oral über 14 von 28 Tagen die Proliferation des Brustepithels im Vergleich zum Ausgangswert nicht signifikant stieg, während die Gabe von 0,625 mg/d CEE (konjugiertes equines Östrogen) plus 5 mg MPA an 14 von 28 Tagen die Proliferation signifikant steigerte. Gleichzeitig wurde die Anzahl bcl-2-positiver (bcl-2: B-Zell-Lymphom 2) Brustzellen reduziert; dies spricht für einen apoptotischen Effekt am Ende der Gestagenphase.

In den letzten Jahren ist die herausragende Bedeutung der mammografischen Dichte als Risikofaktor, dass ein Mammakarzinom entsteht, immer evidenter geworden [56]. So konnten Heusinger et al. [57] in einer Fallkontrollstudie zeigen, dass Patientinnen mit einem Mammakarzinom eine deutlich höhere mammografische Dichte aufwiesen als nicht erkrankte Frauen. Des Weiteren unterliegt sowohl die weibliche Brust als auch die mammografische Dichte vielen hormonellen Einflüssen. Boyd et al. [58] zeigten, dass sich unter einer HT die mammografische Dichte erhöht, während eine antiöstrogene Tamoxifen-Behandlung die mam-

mografische Dichte verringert. Der Einfluss einer HT konnte von anderen Arbeitsgruppen bestätigt werden [59–61].

### Verträglichkeit und Sicherheit von Progesteron

Wie der **Tab. 2** zu entnehmen ist, hat Progesteron eine Reihe von Partialnebenwirkungen, die es deutlich von allen synthetischen Gestagenen unterscheidet. Dieses Profil erklärt die einzelnen Wirkungen auf unterschiedliche Parameter des menschlichen Körpers.

### Einfluss auf den Glukosestoffwechsel

Mehrere Studien konnten zeigen, dass bei nicht diabetischen postmenopausalen Frauen (PEPI-, WHI- und HERS-Studien [PEPI: Postmenopausal Estrogen/Progestin Interventions; HERS: Heart and Estrogen/Progestin Replacement Study]) [34, 48, 62] signifikant niedrigere Nüchternblutzuckerwerte und z.T. auch niedrigere Nüchterninsulinwerte unter oraler Östrogen- bzw. Östrogen-Gestagen-Behandlung im Vergleich zu Placebo vorzufinden waren. Bei der Verabreichung von Progesteron ist nicht mit relevanten Glukosestoffwechseleränderungen zu rechnen. Auch in der E3N-Studie [63] wurde nachgewiesen, dass bei der Anwendung von transdermale Östrogen mit mikronisiertem Progesteron das Diabetesrisiko signifikant reduziert wurde; dies bei einem ebenfalls signifikanten Expositionszeitraum. Im Unterschied zu synthetischen Gestagenen hat Progesteron keine nachteiligen Effekte auf den Glukosehaushalt.

### Einfluss auf den Blutdruck

Alle vorliegenden Untersuchungen zum Progesteron legen dar, dass Progesteron generell blutdruckneutral oder eher leicht blutdrucksenkend ist. Auch in der PEPI-Studie konnte sowohl in der Östrogen- als auch in der Östrogen/Progesterongruppe kein Blut-

druckanstieg im Vergleich zu placebobehandelten Kontrollen festgestellt werden [64].

### Progesteron und Körpergewicht

Sowohl die PEPI-Untersuchung [64] als auch die WHI-Studie konnten darlegen [34, 48], dass hormonbehandelte Frauen in der Menopause im Durchschnitt eine geringere Körpergewichtszunahme aufwiesen als die Frauen, die keine Hormonsubstitution erhalten hatten. Das bei der PEPI-Studie verabreichte Progesteron war bez. des Gewichts ebenfalls neutral, sodass davon auszugehen ist, dass Progesteron keinen Einfluss auf diesen Parameter ausübt.

### Progesteron und Lipidstoffwechsel

Eine Östrogentherapie hat, global gesehen, positive Langzeiteffekte (HDL-C-Spiegel [C: Cholesterin] steigt, LDL-C-Spiegel sinkt) auf das Lipoproteinprofil postmenopausaler Frauen, wobei dieser Effekt häufiger bei der oralen Anwendung beobachtet worden ist.

Im Unterschied dazu verringern synthetische Gestagene die Konzentration von HDL-C, wenn sie mit Östrogenen kombiniert werden. Auch im direkten Vergleich mit synthetischen Gestagenen (MPA, Norethisteron oder Norgestrel) wies mikronisiertes Progesteron geringere negative Effekte auf die HDL-C-Metabolite auf als die synthetischen Gestagene. Saarikoski et al. [65] zeigten in einer Untersuchung, bei der 80 perimenopausale Frauen wegen funktioneller Menometrorrhagien behandelt und in 2 Gruppen unterteilt wurden, die entweder 300 mg/d oral mikronisiertes Progesteron über 10 Tage pro Zyklus oder 15 mg/d Norethisteron über 10 Tage pro Zyklus über 6 aufeinanderfolgende Zyklen erhielten, dass unter Progesteron stabile HDL-C-Werte vorhanden waren, während es zu einer deutlichen Senkung der HDL-C-Werte in der Norethisteron-Gruppe kam ( $p < 0,001$ ). Auch in der schon erwähnten PEPI-Studie konnte gezeigt werden, dass Progesteron den positiven Effekt auf HDL-C, der durch die Östrogene erzielt wird, am wenigsten beeinflusst, gerade im Unterschied zu Medroxyprogesteron, das in den anderen Armen der Studie verwendet worden war [64] (● **Abb. 2**).

### Progesteron und ZNS

Progesteron übt mehrere zentralnervöse Effekte aus. In erster Linie ist die sedierende Wirkung zu nennen. Diese tritt durch die Wirkung seiner Metaboliten, insbesondere  $5\alpha$ - und  $5\beta$ -Allopregnanolon, auf. In Untersuchungen wurden Dosierungen bis zu 1200 mg angewandt. Dabei wurde festgestellt, dass das Phänomen der Müdigkeit zwar subjektiv beschrieben wurde, jedoch keine Beeinträchtigungen der psychischen und bzw. oder physischen Funktionsfähigkeiten vorhanden waren [66–68]. Dieses Phänomen lässt sich positiv bei Frauen ausnutzen, die in der Postmenopause unter Schlafstörungen leiden, wenn Progesteron abends verabreicht wird. Hier besteht ebenfalls ein wichtiger Unterschied zu den synthetischen Gestagenen, da diese nicht in die oben erwähnten Abbauprodukte umgewandelt werden, und somit nicht schlaffördernd wirken. Schumacher et al. [69] legten dar, dass Progesteron neuroaktive Eigenschaften besitzt und dass bei disponierten Frauen anxiolytische und antiepileptische Effekte vorhanden sind [70, 71].

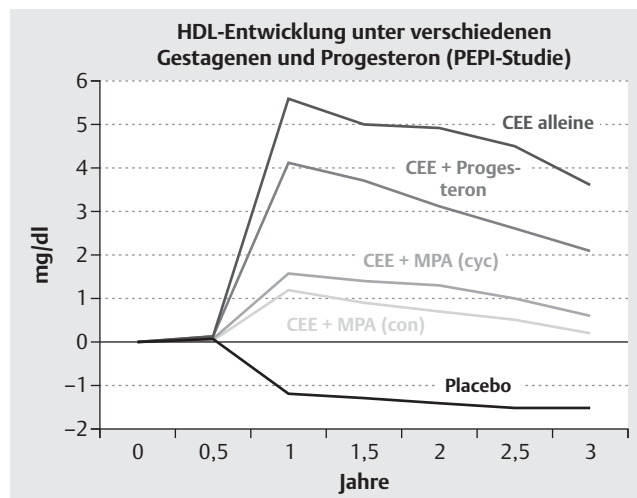

**Abb. 2** HDL-C-Verlauf (HDL-C: Lipoproteine-mit-hoher-Dichte-Cholesterin) unter Östrogenmonotherapie, Östrogen- und Progesterongabe, Östrogen mit MPA (Medroxyprogesteronacetat) zyklisch verabreicht, Östrogen mit MPA kontinuierlich verabreicht und Placebo (von PEPI-Trial) [64]. CEE: konjugierte equine Östrogene (conjugated equine estrogen)

### Sicherheit von Progesteron in der Hormontherapie

Die schon erwähnte PEPI-Studie [34] war die 1. große Untersuchung, bei der orales, mikronisiertes Progesteron zur Behandlung postmenopausaler Beschwerden eingesetzt wurde. In dieser 3-jährigen, placebokontrollierten prospektiven Untersuchung wurden 875 nicht hysterektomierte postmenopausale Frauen randomisiert und in folgende Studienarme unterteilt: Placebo, 28 Tage 0,625 mg CEE/d über 28 Tage, 0,625 mg CEE plus 2,5 mg Medroxyprogesteronacetat kontinuierlich oder zyklisch über die ersten 12 Tage und 0,625 mg CEE plus 200 mg Progesteron über die ersten 12 Tage. Bei 596 Patientinnen wurden Endometriumbiopsien nach der Therapie durchgeführt, um die Sicherheit an diesem Organ zu demonstrieren. Wie erwartet, war die Rate der Endometriumveränderungen in der Gruppe, die CEE alleine eingenommen hatte, am höchsten, während unter den 3 Gestagenschemata keine signifikanten Pathologika am Endometrium auftraten (● **Tab. 1**). Viele andere Befunde, wie subjektives Wohlbefinden, Stoffwechselfparameter, Blutdruck, Gewichtsentwicklung etc., wurden ebenfalls untersucht. Dabei wurden in der Gruppe von Frauen, die das Progesteron einnahmen, keine negativen Effekte nachgewiesen. Eine noch wesentlich größere Untersuchung, die E3N-Studie [63] aus Frankreich, konnte bei über 87 000 postmenopausalen Frauen Daten zur Wirksamkeit und Sicherheit gerade zu den Themenbereichen Mammakarzinom- und Thromboseraten erheben. Es wurden völlig unterschiedliche Gestagene mit der Gabe von mikronisiertem Progesteron verglichen.

Sowohl die Mammakarzinom- als auch die Thromboseraten wurden durch die Gabe von Progesteron bei einer HT im Unterschied zu Nichtanwenderinnen von Hormonen nicht gesteigert (jeweils eine Odds Ratio von 1,08 für das Mammakarzinom (● **Abb. 3**) und 0,9 (● **Abb. 4**) für das Auftreten von Thrombosen).

Die letzte Veröffentlichung des KEEPS-Reports (KEEPS: Kronos Early Estrogen Prevention Study) im Jahr 2011 konnte ebenfalls nicht nur die positiven Effekte des Progesterons auf die kognitiven Funktionen darlegen, sondern auch den schützenden Effekt auf das kardiovaskuläre System – gleichzeitig war das Mamma-

**RR Mammakarzinom**  
**E3N – Ergebnisse (n = 80 377):**  
 Mammakarzinom RR nach HRT-Typ  
 Referenzgruppe = Nichtanwender (RR = 1)

Ergebnis nach HRT-Art (n = 2354 Fälle)

**orale Östrogene mit ...**

- ▶ Norethisteronacetat (46)
- ▶ Cyproteronacetat (34)
- ▶ MPA (29)
- ▶ Promegeston (13)

**transdermale Östrogene mit ...**

- ▶ Progesteron (121)
- ▶ Dydrogesteron (90)
- ▶ Nomegestrolacetat (91)
- ▶ Promegeston (69)
- ▶ Chlormadinonacetat (35)
- ▶ Medrogeston (28)

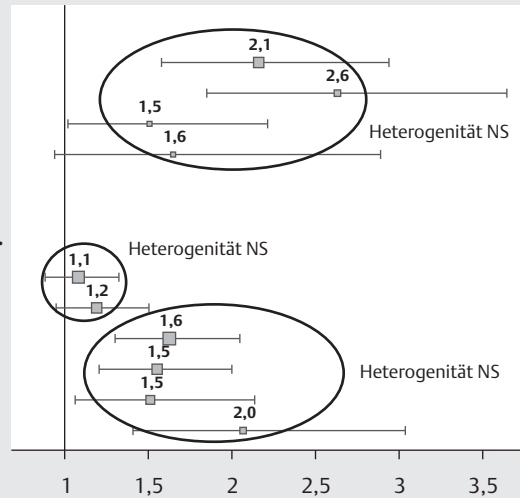

**Abb. 3** Mammakarzinomraten: Ergebnisse der E3N-Studie [63]. MPA: Medroxyprogesteronacetat

**Thromboembolierisiko unter HRT – Ergebnisse der E3N-Studie**

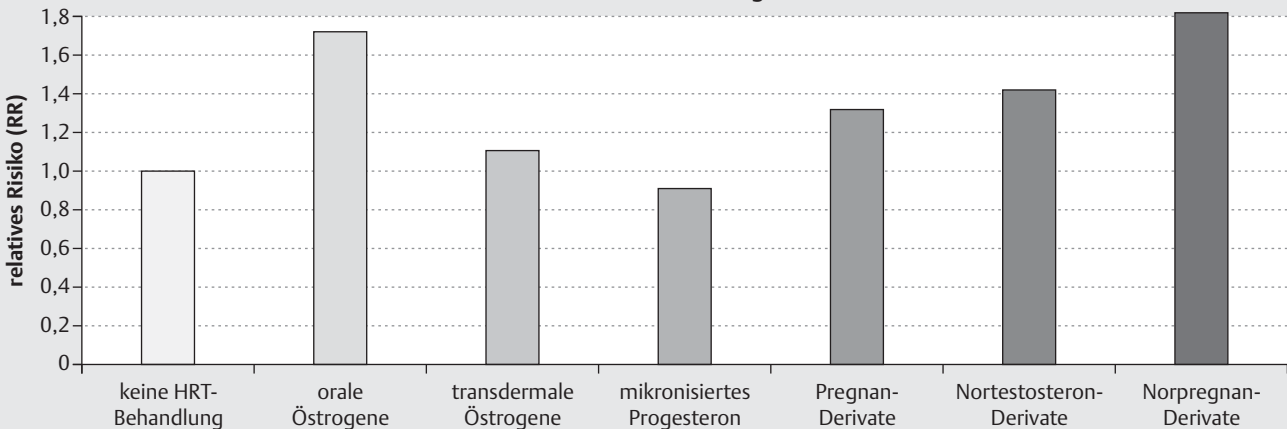

**Abb. 4** Thromboembolieraten unter verschiedenen Gestagenen und Progesteron in der E3N-Studie [63].

karzinomrisiko unter der Gabe von entweder Placebo oder 0,45 mg CEE plus 200 mg Progesteron über 12 Tage oder 50 µg Östradiol pro Tag über ein Pflaster ebenfalls mit 200 mg Progesteron über 12 Tage nicht erhöht. Die Raten an Endometriumkarzinomen, Schlaganfällen, Herzinfarkten und Thrombembolien waren ebenfalls in allen 3 Gruppen gleich [72].

Als absolute Kontraindikation für die Progesteron-Gabe können im engeren Sinne nur die selten auftretende autoimmun-allergische Reaktion oder die Einnahme von Antiepileptika bzw. Tuberkulostatika angesehen werden, da diese Stoffe einen schnelleren hepatischen Abbau fördern.

**Fazit für die Praxis**

▼ Progesteron ist daher als ein sicheres und effektives Gelbkörperhormon in der Behandlung oder hormonellen Substitution in der Menopause der Frau anzusehen, da die einsetzenden Mangelerscheinungen mit einem bioidentischen Präparat behoben werden können. Dies kann sowohl durch die kontinuierliche Gabe (100 mg/d) oder zyklische Gabe (200 mg/d) über 12–14 Tage erfolgen, da hiermit die für Progesteron erforderliche Transformationsdosis erreicht wird und somit eine Sicherheit für das Endometrium gegeben ist.

**Interessenkonflikt**

▼ Der Autor ist ärztlicher Direktor der Firma Velvian GmbH, eines Unternehmens der Exeltis Gruppe.

## Literatur

- 1 Williams CL, Stancel GM. Estrogens and Progestins. In: Goodman LS, Gilman A, eds. The pharmacological Basis of Therapeutics. 9th ed. Elmsford, Oxford: Pergamon Press; 1996: 1411–1440
- 2 Millart P, Paszkowski T. Progesterageny w praktyce ginekologicznej. Ginekolog Prakt 2002; 67: 16–21
- 3 Paszkowski T, Kozłowska J. Progesteron-druga młodość starego leku. Ginekolog Prakt 2003; 70: 52–57
- 4 Loose DS, Stancel GM. Estrogens and Progestins. In: Brunton LL, eds. Goodman & Gilman's the pharmacological Basis of Therapeutics. 11th ed. New York: McGraw-Hill; 2006: 1541–1571
- 5 Morville R, Dray F, Reynier J et al. Biodisponibilité de la progestérone naturelle administrée par voie orale. Mesure des concentrations du stéroïde dans le plasma, l'endomètre et le tissu mammaire. J Gynecol Obstet Biol Reprod 1982; 11: 355–363
- 6 Speroff L, Glass RH, Kase NL, Hrsg. Clinical gynecologic Endocrinology and Infertility. Baltimore, Philadelphia: Lippincott Williams & Wilkins; 1999
- 7 Ottosson UB, Carlstrom K, Damber JE et al. Serum levels of progesterone and some of its metabolites including deoxycorticosterone after oral and parenteral administration. Br J Obstet Gynecol 1984; 91: 1111–1119
- 8 Di Lignieres B, Dennerstein L, Backstrom T. Influence of route of administration on progesterone metabolism. Maturitas 1995; 21: 251–257
- 9 Andréon L, Spigset O, Andersson A et al. Pharmacokinetics of progesterone and its metabolites allopregnanolone and pregnanolone after oral administration of low-dose progesterone. Maturitas 2006; 54: 238–244
- 10 Birziece V, Bäckström T, Johansson IM et al. Neuroactive steroid effects on cognitive functions with a focus on the serotonin and GABA systems. Brain Res Rev 2006; 51: 212–239
- 11 Paszkowski T. Renaissance of the clinical applications of a progesterone. Gin Politec Project 2011; 19: 41–47
- 12 Maxson WS, Hargrove JT. Bioavailability of oral micronized progesterone. Fertil Steril 1985; 5: 622–626
- 13 Situr-Ware R, Bricairec C, De Lignieres B et al. Oral micronized progesterone. Contraception 1987; 36: 373–402
- 14 Simon J, Robinson DE, Andrews MC et al. The absorption of oral micronized progesterone: the effect of food, dose proportionality and comparison with intramuscular progesterone. Fertil Steril 1993; 60: 26–33
- 15 Barbieri RL. The endocrinology of the menstrual cycle. Methods Mol Biol 2014; 1154: 145–169
- 16 Tapia-Pizarro A, Figueroa P, Brito J et al. Endometrial gene expression reveals compromised progesterone signaling in women refractory to embryo implantation. Reprod Biol Endocrinol 2014; 12: 92
- 17 Lessey BA, Young SL. Homeostasis imbalance in the endometrium of women with implantation defects: the role of estrogen and progesterone. Semin Reprod Med 2014; 32: 365–375
- 18 Spencer TE, Bazer FW. Biology of progesterone action during pregnancy recognition and maintenance of pregnancy. Front Biosci 2002; 7: d1879–d1898
- 19 Garfield RE, Shi L, Shi SQ. Use of progesterone and progestin analogs for inhibition of preterm birth and other uterine contractility disorders. Facts Views Vis Obgyn 2012; 4: 237–244
- 20 Gáspár R, Ducza E, Mihávi A et al. Pregnancy-induced decrease in the relaxant effect of terbutaline in the late-pregnant rat myometrium: role of G-protein activation and progesterone. Reproduction 2005; 130: 113–122
- 21 Gálík M, Gáspár R, Kolarovszki-Sipiczki Z et al. Gestagen treatment enhances the tocolytic effect of salmeterol in hormone-induced preterm labor in the rat in vivo. Am J Obstet Gynecol 2008; 198: 319.e1–319.e5
- 22 Kowalewski MP, Beceriklisoy HB, Asla S et al. Time related changes in luteal prostaglandin synthesis and steroidogenic capacity during pregnancy, normal and antiprogestin induced luteolysis in the bitch. Anim Reprod Sci 2009; 116: 129–138
- 23 Haslam SZ. Experimental mouse model of hormonal therapy effects on the postmenopausal mammary gland. Breast Dis 2005; 24: 71–78
- 24 Cline JM, Wood CE. Hormonal effects on the mammary gland of postmenopausal nonhuman primates. Breast Dis 2005–2006; 24: 59–70
- 25 Lactation. Bull World Health Organ 1989; 67 (Suppl.): 19–40
- 26 Check JH. Premature ovarian insufficiency - fertility challenge. Minerva Ginecol 2014; 66: 133–153
- 27 Practice Committee of the American Society for Reproductive Medicine. The clinical relevance of luteal phase deficiency: a committee opinion. Fertil Steril 2012; 98: 1112–1117
- 28 Moberg C, Bourlev V, Ilyasova N et al. Levels of estrogen receptor, progesterone receptor and  $\alpha$ B-crystallin in eutopic endometrium in relation to pregnancy in women with endometriosis. Hum Fertil (Camb) 2014; 19: 1–8; [Epub ahead of print]
- 29 Narin R, Nazik H, Aytan H et al. Effects of natural progesterone on endometriosis in an experimental rat model: is it effective? Clin Exp Obstet Gynecol 2014; 41: 455–459
- 30 Pasqualini JR. Progestins in the menopause in healthy women and breast cancer patients. Maturitas 2009; 62: 343–348
- 31 Ziolkiewicz A, Pawłowski B, Ellison PT et al. Higher luteal progesterone is associated with low levels of premenstrual aggressive behavior and fatigue. Biol Psychol 2012; 91: 376–382
- 32 Vaisbuch E, de Ziegler D, Leong M et al. Luteal-phase support in assisted reproduction treatment: real-life practices reported worldwide by an updated website-based survey. Reprod Biomed Online 2014; 28: 330–335
- 33 Arredondo F, Noble LS. Endocrinology of recurrent pregnancy loss. Semin Reprod Med 2006; 24: 33–39
- 34 The Writing Group for the PEPI Trial. Effects of hormone replacement therapy on endometrial histology in postmenopausal woman. The postmenopausal estrogen/progestin interventions (PEPI) trial. JAMA 1996; 275: 370–375
- 35 Fitzpatrick LA, Pace C, Wiita B. Comparison of regimens containing oral micronized progesterone or medroxyprogesterone acetate on quality of life in postmenopausal woman: a cross-sectional study. J Women's Health Gender-based Med 2000; 9: 381–387
- 36 Ryan N, Rosner A. Quality of life and costs associated with micronized progesterone and medroxyprogesterone acetate in hormone replacement therapy for nonhysterectomized, postmenopausal women. Clin Ther 2001; 23: 1099–1115
- 37 Cummings JA, Brizendine L. Comparison of physical and emotional side effects of progesterone or medroxyprogesterone in early postmenopausal women. Menopause 2002; 9: 254–263
- 38 Schindler AE. Einsatz von Gestagenen in der Schwangerschaft. Therapeutische und präventive Anwendungsmöglichkeiten. Frauenarzt 2005; 46: 586–589
- 39 Malet C, Spritzer P, Guillaumin D et al. Progesterone effect on cell growth, ultrastructural aspect and estradiol receptors of normal human breast epithelial (HABE) cells in culture. J Steroid Biochem Mol Biol 2000; 73: 1319–1330
- 40 Groshong SD, Owen GI, Grimison B et al. Biphasic regulation of breast cancer cell growth by progesterone: role of the cyclin-dependent kinase inhibitors, p21 and p27(Kip1). Mol Endocrinol 1997; 11: 1593–1607
- 41 Soderqvist G, von Schoultz B, Tani E et al. Estrogen and progesterone receptor content in breast epithelial cells from healthy women during the menstrual cycle. Am J Obstet Gynecol 1993; 168: 874–879
- 42 De Lignieres B. Effects of progestogens on the postmenopausal breast. Climacteric 2002; 5: 229–235
- 43 Foidart JM, Colin C, Denoo X et al. Estradiol and progesterone regulate the proliferation of human breast epithelial cells. Fertil Steril 1998; 69: 963–969
- 44 Formby B, Wiley TS. Bcl-2, surviving and variat CD44 v7-v10 are down-regulated and p53 is upregulated in breast cancer cells by progesterone: inhibition of cell growth and induction of apoptosis. Mol Cell Biochem 1999; 202: 53–61
- 45 Lorrain J, Lalumiere LG, Caron P. The effects of oral micronized progesterone on bleeding patterns, endometrial histology and bone density in postmenopausal woman on hormone replacement therapy. Int J Gynaecol Obstet 1994; 46: 77–79
- 46 Pélissier C, Maroni M, Yaneva H et al. Chlormadinone acetate versus micronized progesterone in the sequential combined hormone replacement therapy of the menopause. Maturitas 2001; 40: 85–94
- 47 Göretzlehner G, Lauritzen C, Römer T, Rossmannith W. Praktische Hormontherapie in der Gynäkologie. 6. Aufl. Berlin: De Gruyter; 2011: 44
- 48 Writing Group for the Women's Health Initiative Investigators. Risks and benefits of estrogen and progestin in healthy postmenopausal women. Principal results from the Women's Health Initiative Randomized Controlled Trial. JAMA 2002; 288: 321–333
- 49 Million Women Study Collaborators. Breast cancer and hormone replacement in the Million Women Study. Lancet 2003; 362: 419–427
- 50 Rajkumar L, Canada A, Esparza D et al. Decreasing hormonal protection is key to breast cancer prevention. Endocrine 2009; 35: 220–226

- 51 Seeger H, Wallwiener D, Mueck AO. The effect of progesterone and synthetic progestins on serum- and estradiol-stimulated proliferation of human breast cancer cells. *Horm Metab Res* 2003; 35: 76–80
- 52 Franke HR, Vermes I. Differential effects of progestogens on breast cancer cell lines. *Maturitas* 2003; 46 (Suppl. 1): 555–558
- 53 Mueck AO, Seeger H, Wallwiener D. Comparison of the proliferative effects of estradiol and conjugated equine estrogens on human breast cancer cells and impact of continuous combined progestogen addition. *Climacteric* 2003; 6: 221–227
- 54 Otto C, Fuchs I, Vonk R et al. Comparative analysis of the uterine and mammary gland effects of progesterone and medroxyprogesterone acetate. *Maturitas* 2010; 65: 386–391
- 55 Murkes D, Conner P, Leifland K. Effects of percutaneous estradiol-oral progesterone versus oral conjugated equine estrogens-medroxyprogesterone acetate on breast cell proliferation and bcl-2 protein in healthy women. *Fertil Steril* 2011; 95: 1188–1191
- 56 Boyd NF, Guo H, Martin LJ et al. Mammographic density and the risk and reduction of breast cancer. *N Engl J Med* 2007; 356: 227–236
- 57 Heusinger K, Loehberg CR, Haerberle L et al. Mammographic density as a risk factor for breast cancer in a German case-control study. *Eur J Cancer Prev* 2011; 20: 1–8
- 58 Boyd NF, Melnichouk O, Martin LJ et al. Mammographic density, response to hormones, and breast cancer risk. *J Clin Oncol* 2011; 29: 2985–2992
- 59 Carmona-Sánchez E, Cuadros López JL, Cuadros Celerrío AM et al. Assessment of mammographic density in postmenopausal women during long term hormone replacement therapy. *Gynecol Endocrinol* 2013; 29: 1067–1070
- 60 Brand JS, Czene K, Erikson L et al. Influence of lifestyle factors on mammographic density in postmenopausal women. *PLoS One* 2013; 8: e81876
- 61 Chen WY, Colditz GA, Rosner B et al. Use of postmenopausal hormones, alcohol, and risk for invasive breast cancer. *Ann Intern Med* 2002; 137: 798–804
- 62 Kanaya AM, Herrington D, Vittinghoff E et al. Heart and Estrogen/progestin Replacement Study: Glycemic effects of postmenopausal hormone therapy: the Heart and Estrogen/progestin Replacement Study. A randomized, doubled-blind, placebo-controlled trial. *Ann Intern Med* 2003; 138: 1–9
- 63 Fournier A, Berrino F, Clavel-Chapelon F. Unequal risks for breast cancer associated with different hormone replacement therapies: results from the E3N cohort study. *Breast Cancer Res Treat* 2008; 107: 103–111
- 64 Writing Group for the PEPI Trial. Effects of estrogen or estrogen/progestin regimens on heart disease. Risks factors in postmenopausal women. *JAMA* 1995; 273: 199–208
- 65 Saarikoski S, Yliskoski M, Penttilä I. Sequential use of norethisterone and natural progesterone in pre-menopausal bleeding disorders. *Maturitas* 1990; 12: 89–97
- 66 Freeman E, Rickels K, Sondheimer SJ et al. A double-blind trial of oral progesterone, alprazolam and placebo in treatment of severe premenstrual syndrome. *JAMA* 1995; 274: 51–57
- 67 Dennerstein L, Spencer Gardner C, Gotts G et al. Progesterone and the premenstrual syndrome: a double-blind crossover trial. *Br Med J* 1985; 290: 1617–1621
- 68 Freeman EW, Weinstock L, Rickels K et al. A placebo-controlled study of effects of oral progesterone on performance and mood. *Br J Clin Pharmacol* 1992; 33: 293–298
- 69 Schumacher M, Guennoun R, Ghomari A et al. Novel perspectives for progesterone in hormone replacement therapy, with special reference to the nervous system. *Endocr Rev* 2007; 28: 387–439
- 70 Eser D, Schüle C, Baghai TC et al. Neuroactive steroids and affective disorders. *Pharmacol Biochem Behav* 2006; 84: 656–666
- 71 Herzog AG. Reproductive endocrine considerations and hormonal therapy for women with epilepsy. *Epilepsia* 1991; 32: 527–533
- 72 Wharton W, Gleason CE, Miller VM et al. Rationale and design of the Kronos Early Estrogen Prevention Study (KEEPS) and the KEEPS cognitive and affective sub study (KEEPS Cog). *Brain Res* 2013; 1514: 12–17
- 73 Schindler AE, Campagnoli C, Druckmann R et al. Classification and pharmacology of progestins. *Maturitas* 2003; 46: 7–16
